# Supplementary material for: Yes1 signaling mediates the resistance to Trastuzumab/Lap atinib in breast cancer
Source: PubMed Central journal article supplement (PMC5291431; doi:10.1371/journal.pone.0171356), 2017-02-03

Fig 2B

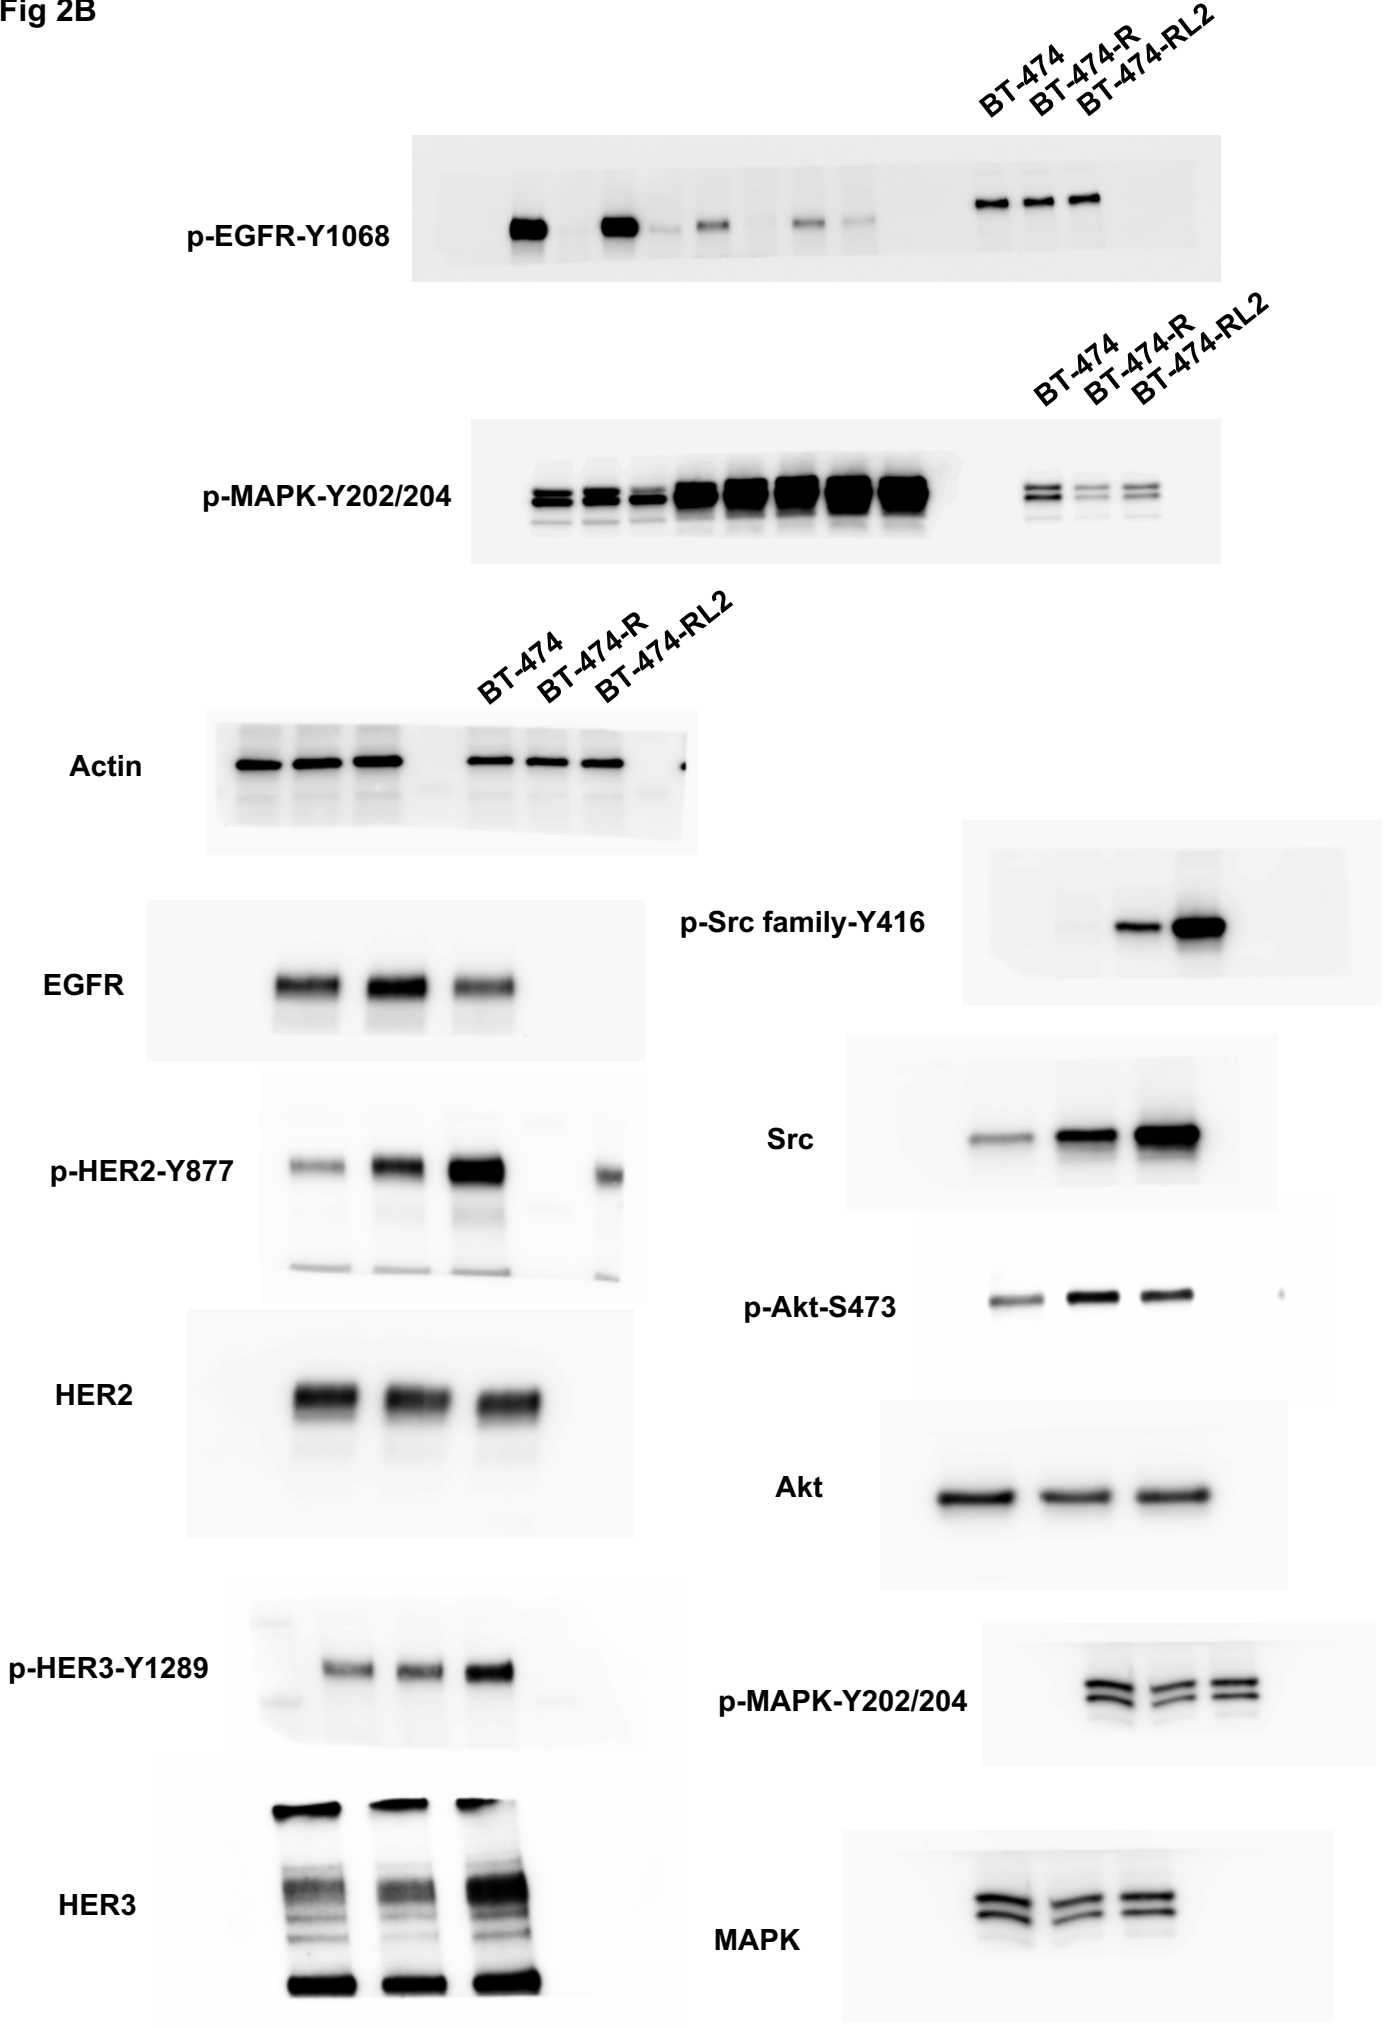

Fig 3B

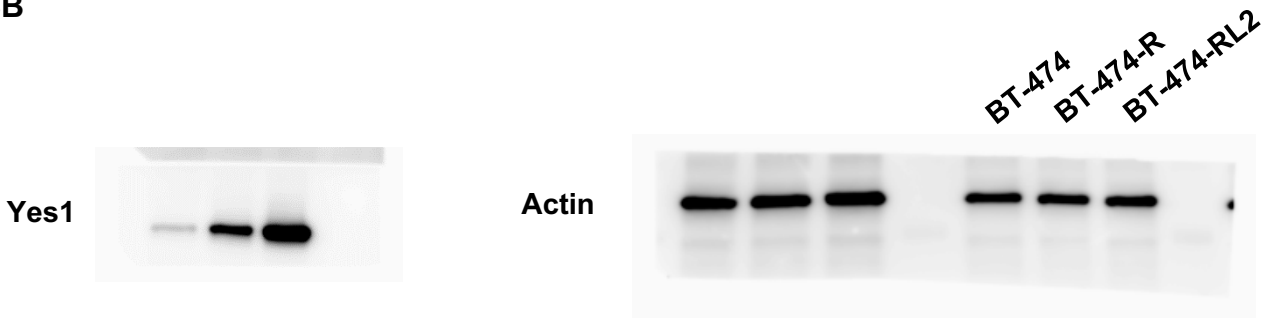

Fig 3D

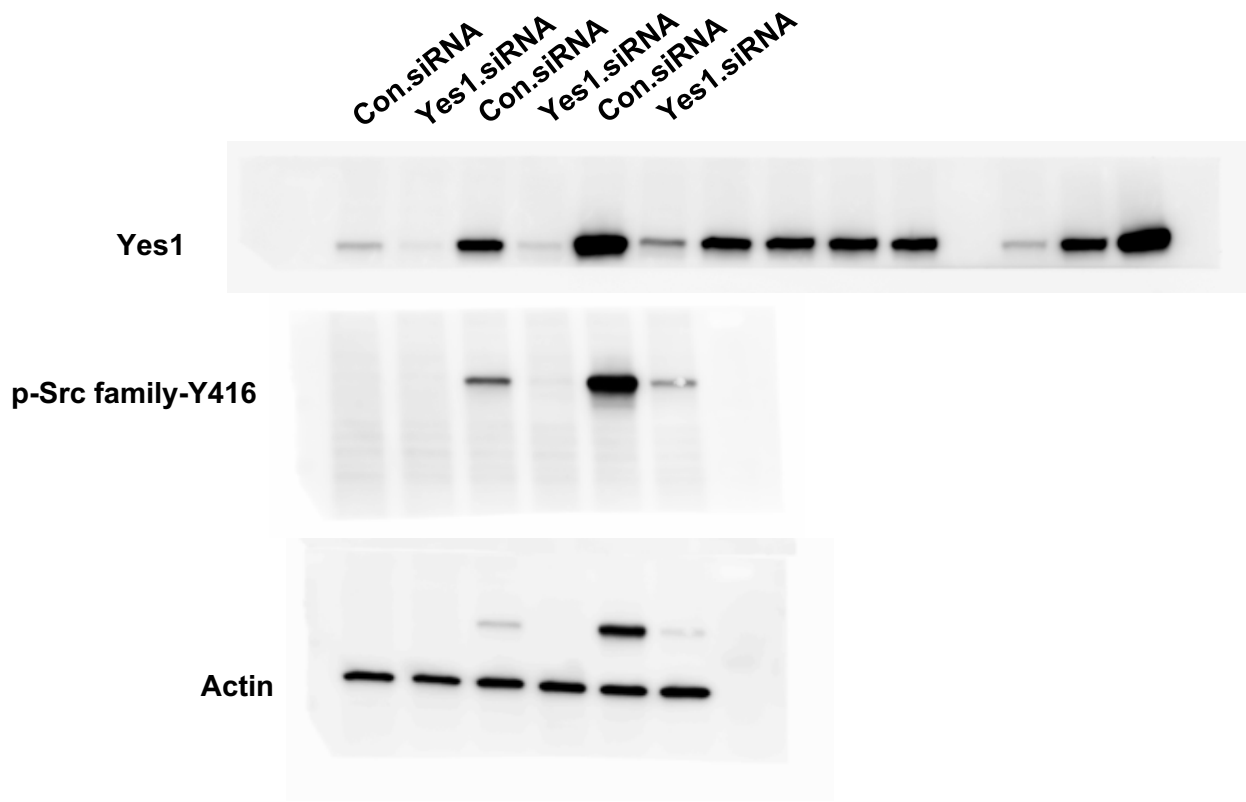



Fig 5B

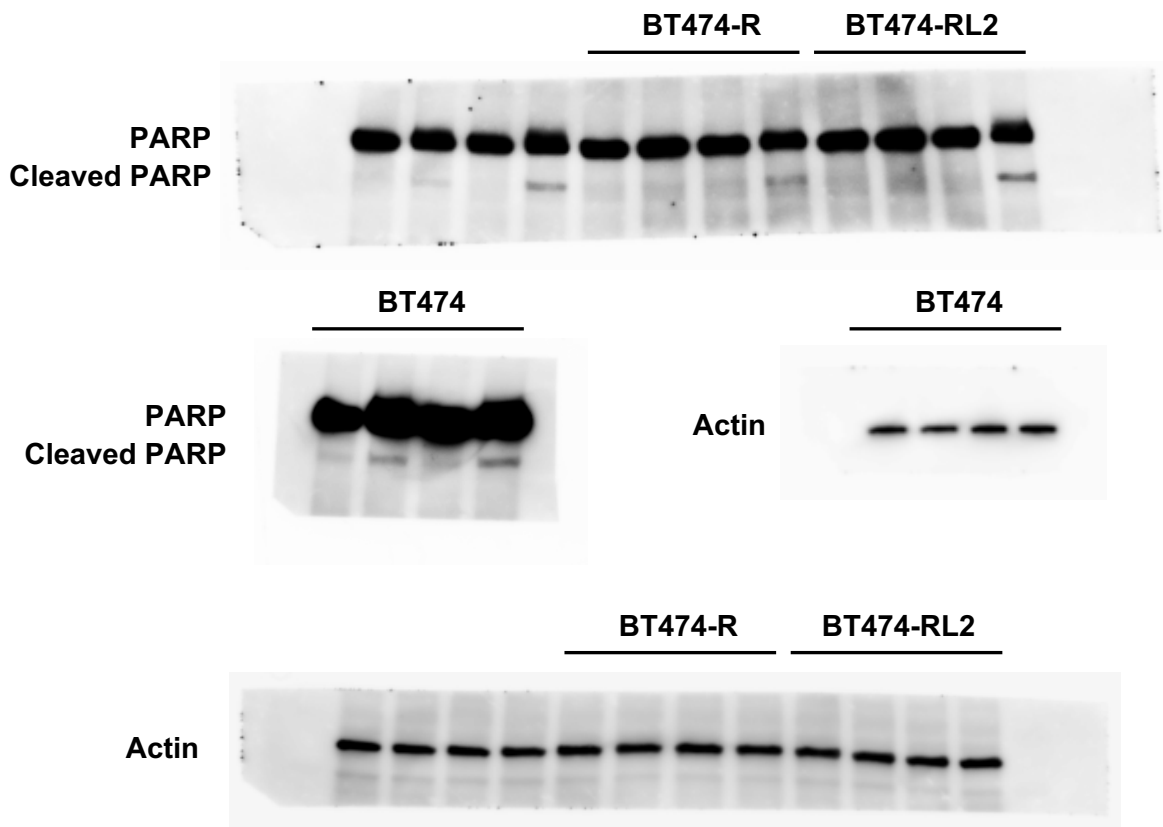

S1 Fig

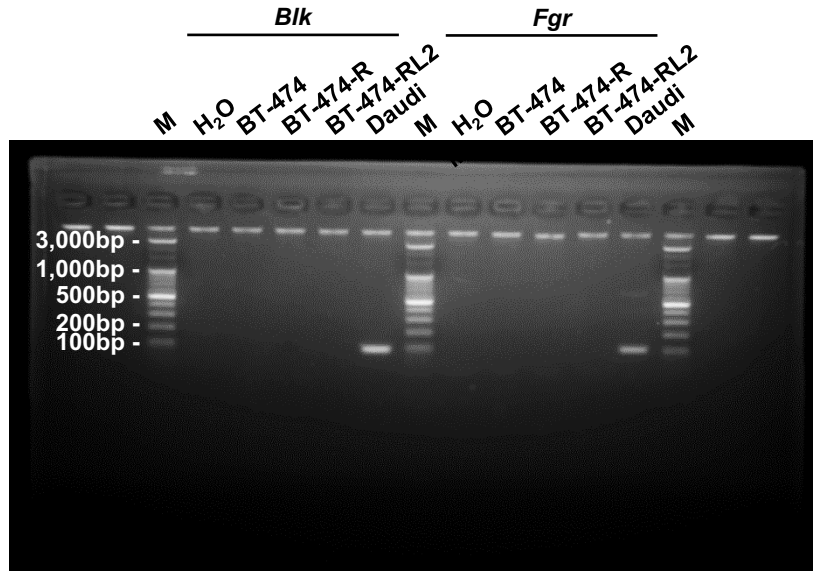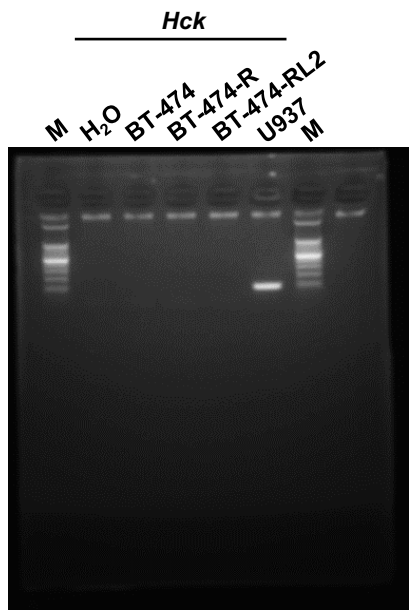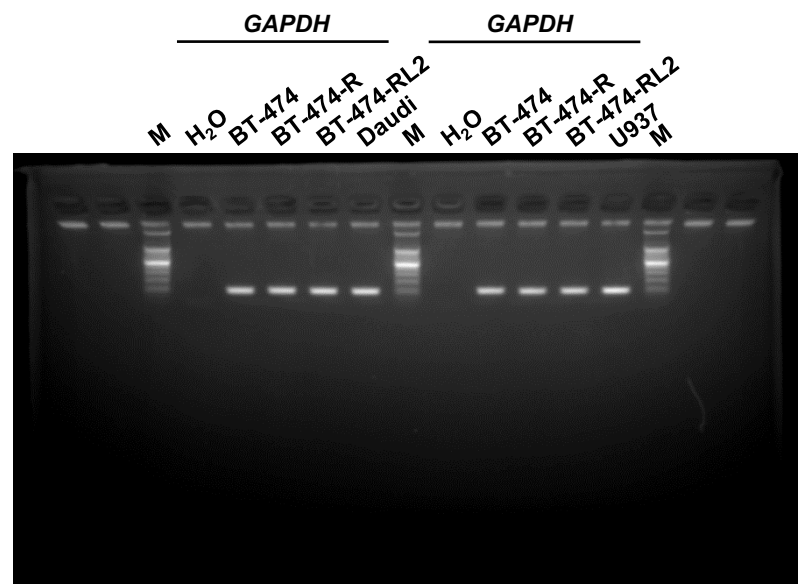

Supplement: pone.0171356.s003.pdf [file pone.0171356.s003.pdf]
